# Supplementary material for: The Emergence of Japanese Encephalitis Virus in Australia in 2022: Existing Knowledge of Mosquito Vectors
Source: MDPI journal article supplement (doi:10.3390/v14061208), 2022-06-02
Supplement: s1 [file s1]

**Supplementary Table S1.** Mosquitoes collected from Torres Strait islands of Badu and Saibai, northern Australia, and the Western Province of Papua New Guinea between 1995 and 2000, and processed for detection of Japanese encephalitis virus (from [1–5]).

| Species                                          | Collection location |        |                  |
|--------------------------------------------------|---------------------|--------|------------------|
|                                                  | Badu                | Saibai | Papua New Guinea |
| <i>Aedeomyia catasticta</i>                      | 0                   | 0      | 178              |
| <i>Aedes aurantius aurantius</i>                 | 0                   | 3      | 179              |
| <i>Ae. culiciformis</i>                          | 24,839              | 0      | 0                |
| <i>Ae. iwi</i>                                   | 7                   | 0      | 0                |
| <i>Ae. katherinensis</i>                         | 2                   | 0      | 0                |
| <i>Ae. kochi</i>                                 | 50,612              | 2,688  | 2,388            |
| <i>Ae. littlechildi</i>                          | 453                 | 1      | 6                |
| <i>Ae. notoscriptus</i>                          | 33                  | 0      | 9                |
| <i>Ae. scutellaris</i>                           | 139                 | 15     | 0                |
| <i>Ae. stoneorum</i>                             | 10,313              | 0      | 20               |
| <i>Ae. tremulus</i>                              | 54                  | 0      | 0                |
| <i>Ae. vigilax</i>                               | 3,249               | 601    | 1,721            |
| <i>Anopheles bancroftii</i>                      | 0                   | 0      | 601              |
| <i>An. hilli</i>                                 | 28                  | 6      | 0                |
| <i>Anopheles farauti sensu lato</i> <sup>a</sup> | 136                 | 3,446  | 29,262           |
| <i>Anopheles spp.</i> <sup>b</sup>               | 0                   | 1      | 0                |
| <i>Armigeres papuensis</i>                       | 0                   | 0      | 257              |
| <i>Bironella simmondsi</i>                       | 0                   | 0      | 98               |
| <i>Coquillettidia crassipes</i>                  | 2                   | 15,787 | 1,139            |
| <i>Culex australicus</i>                         | 0                   | 0      | 186              |
| <i>Cx. bitaeniorhynchus</i>                      | 24                  | 0      | 1,212            |
| <i>Cx. gelidus</i>                               | 84                  | 93     | 0                |
| <i>Cx. hilli</i>                                 | 0                   | 0      | 296              |
| <i>Cx. pullus</i>                                | 0                   | 0      | 87               |
| <i>Cx. quinquefasciatus</i>                      | 4                   | 733    | 1598             |
| <i>Cx. sitiens</i>                               | 3                   | 0      | 0                |
| <i>Cx. sitiens</i> subgroup <sup>b</sup>         | 35,815              | 44,755 | 219,520          |
| <i>Cx. starkeae</i>                              | 106                 | 0      | 0                |
| <i>Cx. vicinus</i>                               | 866                 | 0      | 22,339           |
| <i>Cx. whitmorei</i>                             | 22                  | 0      | 0                |
| <i>Ficalbia minima</i>                           | 0                   | 0      | 535              |
| <i>Mansonia papuensis</i>                        | 0                   | 0      | 1,992            |
| <i>Mansonia septempunctata</i>                   | 0                   | 0      | 1,044            |
| <i>Ma. uniformis</i>                             | 0                   | 428    | 1,636            |
| <i>Tripteroides alboscutellatus</i>              | 0                   | 0      | 6                |
| <i>Tp. atripes</i>                               | 18                  | 1      | 3                |

|                              |         |        |         |
|------------------------------|---------|--------|---------|
| <i>Tp. magnesianus</i>       | 1       | 0      | 1       |
| <i>Uranotaenia albescens</i> | 2       | 5      | 0       |
| <i>Uranotaenia</i> spp.      | 1       | 26     | 0       |
| <i>Verrallina carmentis</i>  | 8,909   | 0      | 602     |
| <i>Ve. funerea</i>           | 706     | 15,465 | 30,065  |
| <i>Ve. lineata</i>           | 0       | 0      | 2,334   |
| <i>Verrallina</i> spp.       | 0       | 0      | 1,086   |
| Total processed              | 136,428 | 84,054 | 320,400 |

<sup>a</sup>*Anopheles farauti sensu lato* refers the members of the *Anopheles farauti* species complex [6].

<sup>b</sup>Genus names followed by “spp.” represents specimens that could not be identified to species level.

<sup>c</sup>Includes the morphologically similar species *Culex annulirostris*, *Cx. palpalis* and *Cx. sitiens*.

1. Johansen, C.A.; Nisbet, D.J.; Foley, P.N.; van den Hurk, A.F.; Hall, R.A.; Mackenzie, J.S.; Ritchie, S.A. Flavivirus isolations from mosquitoes collected from Saibai Island in the Torres Strait, Australia, during an incursion of Japanese encephalitis virus. *Med Vet Entomol* **2004**, *18*, 281-287, doi: 10.1111/j.0269-283X.2004.00510.x.
2. Johansen, C.A.; van den Hurk, A.F.; Pyke, A.T.; Zborowski, P.; Phillips, D.A.; Mackenzie, J.S.; Ritchie, J.S. Entomological Investigations of an outbreak of Japanese encephalitis virus in the Torres Strait, Australia, in 1998. *J Med Entomol* **2001**, *38*, 581-588, doi: 10.1603/0022-2585-38.4.581.
3. Johansen, C.A.; van den Hurk, A.F.; Ritchie, S.A.; Zborowski, P.; Paru, R.; Bockarie, M.J.; Drew, A.C.; Khromykh, T.I.; Mackenzie, J.S. Isolation of Japanese encephalitis virus from mosquitoes (Diptera: Culicidae) collected in the Western Province of Papua New Guinea, 1997-1998. *Am J Trop Med Hyg* **2000**, *62*, 631-63, doi: 10.4269/ajtmh.2000.62.631.
4. Ritchie, S.A.; Phillips, D.; Broom, A.; Mackenzie, J.; Poidinger, M.; van den Hurk, A. Isolation of Japanese encephalitis virus from *Culex annulirostris* in Australia. *Am J Trop Med Hyg* **1997**, *56*, 80-84, doi: 10.4269/ajtmh.1997.56.80.
5. van den Hurk, A.F.; Nisbet, D.J.; Johansen, C.A.; Foley, P.N.; Ritchie, S.A.; Mackenzie, J.S. Japanese encephalitis on Badu Island, Australia: the first isolation of Japanese encephalitis virus from *Culex gelidus* in the Australasian region and the role of mosquito host-feeding patterns in virus transmission cycles. *Trans Royal Soc Trop Med Hyg* **2001**, *95*, 595-60, doi: 10.1016/s0035-9203(01)90090-2.0.
6. Beebe, N.W.; Russell, T.; Burkot, T.R.; Cooper, R.D. *Anopheles punctulatus* group: evolution, distribution, and control. *Ann Rev Entomol* **2015**, *60*, 335-350, doi:10.1146/annurev-ento-010814-021206.
